# Supplementary figures and images for: Investigation of the Larvicidal Potential of Silver Nanoparticles againstCulex quinquefasciatus: A Case of a Ubiquitous Weed as a Useful Bioresource
Source: Hindawi journal article supplement (doi:10.1155/2016/4363751), 2016-01-01

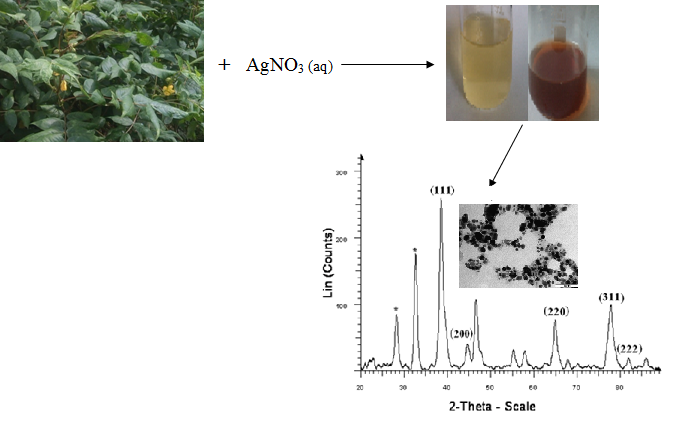

Supplement: f1 [file 4363751.f1.docx]
